# Supplementary material
Source: publisher figshare collection journal article supplement (https://acs.figshare.com/ndownloader/files/3949759)
Supplement: Supplementary file 1 [file 3949759]

## Supporting Information for Publication

The calculation of correlation function  $K(z)$  was made in the following way on the basis of the observed 2D SAXS patterns shown in Figure 6. At first, the 2D-SAXS patterns were transformed to the 1D-scattering profiles by integrating the intensity along the line passing through the center and the scattering peak as a function of the scattering angle  $2\theta$  or a function of scattering vector  $q$  ( $= 4\pi \cdot \sin(\theta)/\lambda$ ,  $\lambda$  = X-ray wavelength = 1.00 Å). In this integration, the intensity correction must be made for the fibrous sample. That is to say, as discussed in the literature,<sup>37,38</sup> the scattering intensity from the cylindrical fibril is expressed as  $I(q_1, q_2) \propto I_0(q_1) \cdot (J_1(q_2 R)/(q_2 R))^2$ , where  $I_0(q_1)$  is the intensity from the infinitely wide fibril,  $J_1$  is a Bessel function of the first order, and  $q_1$  and  $q_2$  are the scattering vector components along the axial and radial directions of the cylindrical fibril with a radius  $R$ . The  $R$  is roughly in an order of 100 Å. The term  $(J_1(q_2 R)/(q_2 R))^2$  decreases sharply along the  $q_2$  direction. Therefore, in order to obtain the scattering intensity  $I_0(q_1)$  of the 1D-arrayed lamellae of infinitely large width, it is needed to correct the observed intensity as long as the integration covers an appreciably wide region of  $q_2$ . In the present case, the correlation function was calculated for the 1-dimensionally-stacked lamellar structure, and so the integration was performed over the relatively narrow  $q_2$  range, about  $-0.01 \sim 0.01 \text{ Å}^{-1}$  around the peak of

the scattering intensity. So the correction was not made as the first approximation. Figure 11 (a) and (c) in the text show the thus-obtained 1D-SAXS profiles in the stretching and relaxing processes, respectively, from which the correlation function  $K(z)$  were calculated using the following equation.<sup>39,40</sup>

$$K(z) \propto \int I(q)q^2 \cos(qz) dq$$

where  $z$  is the correlation length between the stacked lamellae. Figure 11 (b) and (d) show a series of  $K(z)$  calculated for all the observed SAXS profiles. The various points in the  $K(z)$  curve give us the various information about the stacked lamellar structure as illustrated in Figure B1.<sup>31,32</sup> This information is available free of charge via the Internet at <http://pubs.acs.org/>.

## References

- (37) Bonart, R. *Kolloid Z. Z. Polym.*, **1964**, *194*, 97.
- (38) Crist Jr, B, *J. Appl. Cryst.*, **1979**, *12*, 27.
- (39) Guinier, A.; Fournet, G. *Small Angle Scattering of X-Rays*, **1955**, John Wiley, New York.
- (40) Feigin, L. A.; Svergun, D. I. *Structure Analysis by Small-Angle X-ray and Neutron Scattering*, **1987**, Plenum Press, New York.

Figure B1 (a) Definition of stacked lamellar structural model and (b) the correlation function  $K(z)$ . The various structural parameters are obtained from the various points on the  $K(z)$  curve.<sup>39,40</sup>

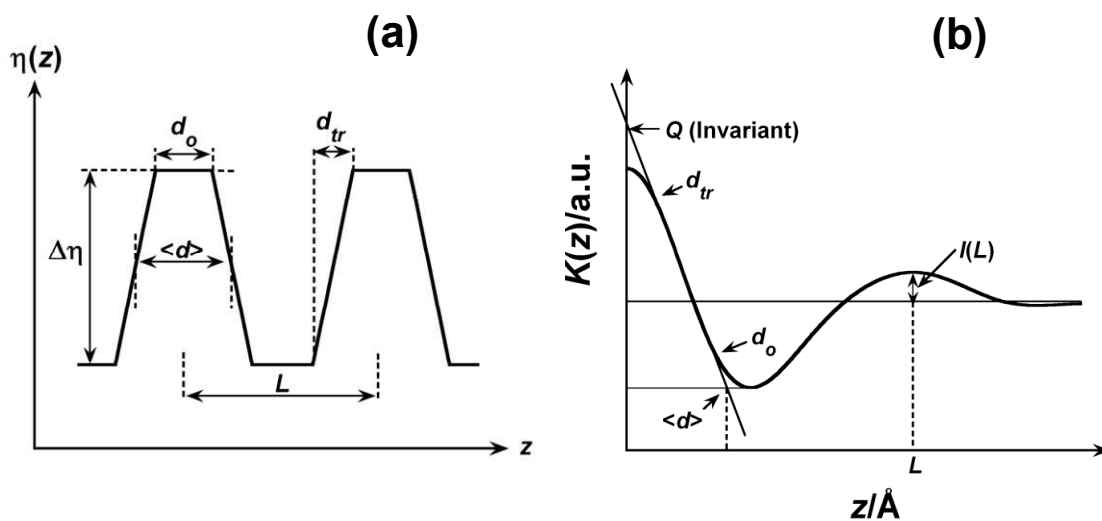

Figure B1
